# Supplementary material for: Investigating the innate selectivity issues of methane to methanol: consideration of an aqueous environment
Source: Royal Society of Chemistry journal article supplement (doi:10.1039/d0sc05402j), 2021-01-01

**Supporting Information:**

**Investigating the Innate Selectivity Issues of Methane to Methanol: Consideration of an Aqueous Environment**

Rhys J. Bunting, Peter S. Rice, Jillian Thompson, P. Hu\*

School of Chemistry and Chemical Engineering, Queen's University Belfast, David Keir Building,  
Stranmillis Road, Belfast, BT9 5AG

Corresponding Author:

\*p.hu@qub.ac.uk

**Contents of Supporting Information:**

Discrete energies for C-H activation, C-O coupling, and C-OH coupling for a variety of fcc metals – S11

Tabularised form of the free energies calculated by umbrella sampling for the Pd(111) surface – S12

Energies of additional elementary steps considered for the Pd(111) surface – S13

C-O coupling in the aqueous phase snapshot – S14

S11: Total energy changes and total energy barriers for the elementary steps of C-H activation, C-O coupling, and C-OH coupling for a variety of fcc metal surfaces. All energies are in eV.

| C-H   | CH <sub>3</sub> -H |                     | CH <sub>2</sub> OH-H |                     |
|-------|--------------------|---------------------|----------------------|---------------------|
| Metal | $\Delta U$ (eV)    | E <sub>a</sub> (eV) | $\Delta U$ (eV)      | E <sub>a</sub> (eV) |
| Ag    | 1.74               | 2.251               | 1.491                | 1.844               |
| Au    | 1.303              | 1.848               | 0.926                | 1.509               |
| Cu    | 0.902              | 1.577               | 0.716                | 1.272               |
| Ir    | 0.305              | 0.802               | -0.089               | 0.529               |
| Ni    | -0.162             | 0.732               | -0.377               | 0.453               |
| Pd    | 0.207              | 0.74                | -0.31                | 0.481               |
| Pt    | 0.127              | 0.778               | -0.356               | 0.491               |
| Rh    | 0.24               | 0.689               | -0.324               | 0.408               |

| C-O   | CH <sub>3</sub> -O |                     | CH <sub>2</sub> OH-O |                     |
|-------|--------------------|---------------------|----------------------|---------------------|
| Metal | $\Delta U$ (eV)    | E <sub>a</sub> (eV) | $\Delta U$ (eV)      | E <sub>a</sub> (eV) |
| Ag    | -1.667             | 0.756               | -2.039               | 0.14                |
| Au    | -0.853             | 0.931               | -1.091               | 0.451               |
| Cu    | -0.516             | 1.751               | -0.808               | 0.827               |
| Ir    | 0.361              | 2.052               | 0.23                 | 1.995               |
| Ni    | 1.021              | 1.45                | 0.962                | 1.296               |
| Pd    | 0.301              | 1.878               | 0.291                | 1.125               |
| Pt    | -0.021             | 2.356               | 0.218                | 2.135               |
| Rh    | 0.542              | 1.571               | 0.598                | 1.419               |

| C-OH  | CH <sub>3</sub> -OH |                     | CH <sub>2</sub> OH-OH |                     |
|-------|---------------------|---------------------|-----------------------|---------------------|
| Metal | $\Delta U$ (eV)     | E <sub>a</sub> (eV) | $\Delta U$ (eV)       | E <sub>a</sub> (eV) |
| Ag    | -0.857              | 1.37                | -1.28                 | 0.835               |
| Au    | -1.207              | 1.241               | -1.511                | 0.705               |
| Cu    | -0.171              | 1.78                | -0.685                | 1.089               |
| Ir    | -0.347              | 1.694               | -0.528                | 1.108               |
| Ni    | 0.276               | 2.037               | 0.128                 | 1.645               |
| Pd    | -0.346              | 1.539               | -0.464                | 1.2323              |
| Pt    | -0.584              | 1.267               | -0.693                | 1.143               |
| Rh    | 0.009               | 1.946               | -0.034                | 1.598               |

SI2: Tabularised Helmholtz free energy changes and free energy barriers for the energy profiles found in the main text (fig. 2/4)

| Gas  | CH <sub>4</sub> |                     | CH <sub>3</sub> OH |                     |
|------|-----------------|---------------------|--------------------|---------------------|
| Step | $\Delta F$      | E <sub>a</sub> (eV) | $\Delta F$         | E <sub>a</sub> (eV) |
| C-H  | -1.15           | 0.37                | -1.24              | 0.34                |
| C-O  | 0.01            | 1.03                | -0.15              | 0.69                |
| C-OH | 0.11            | 1.26                | -0.04              | 1.04                |

| Aq   | CH <sub>4</sub> |                     | CH <sub>3</sub> OH |                     |
|------|-----------------|---------------------|--------------------|---------------------|
| Step | $\Delta F$      | E <sub>a</sub> (eV) | $\Delta F$         | E <sub>a</sub> (eV) |
| C-H  | -0.37           | 0.64                | -0.43              | 0.54                |
| C-O  | 0.54            | 1.35                | 0.00               | 0.99                |
| C-OH | 0.22            | 1.30                | 0.06               | 1.14                |

SI3: Total energy changes and total energy barriers for extra elementary steps considered for the Pd(111) surface

| Elementary Step                               | $\Delta U$ (eV) | E <sub>a</sub> (eV) |
|-----------------------------------------------|-----------------|---------------------|
| CH <sub>3</sub> O* + H* -> CH <sub>3</sub> OH | -0.46           | 0.59                |
| CH <sub>3</sub> O* -> CH <sub>2</sub> O*+H*   | -0.34           | 0.27                |

SI4a: Snapshot of the C-O coupling elementary step for methane in the aqueous phase. The R-R coordinate is at the 2.1Å window, close to the transition state distance.

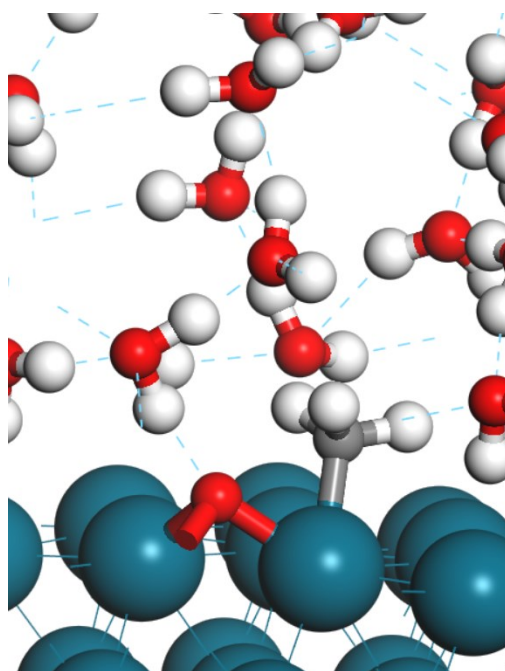

SI4b: Local radial distribution function for surface oxygen to hydrogen for the simulation of SI4a. The first peak at 2 Å correlates to the coordinating water molecule, whilst the second peak correlates to the hydrogen of the methyl group.

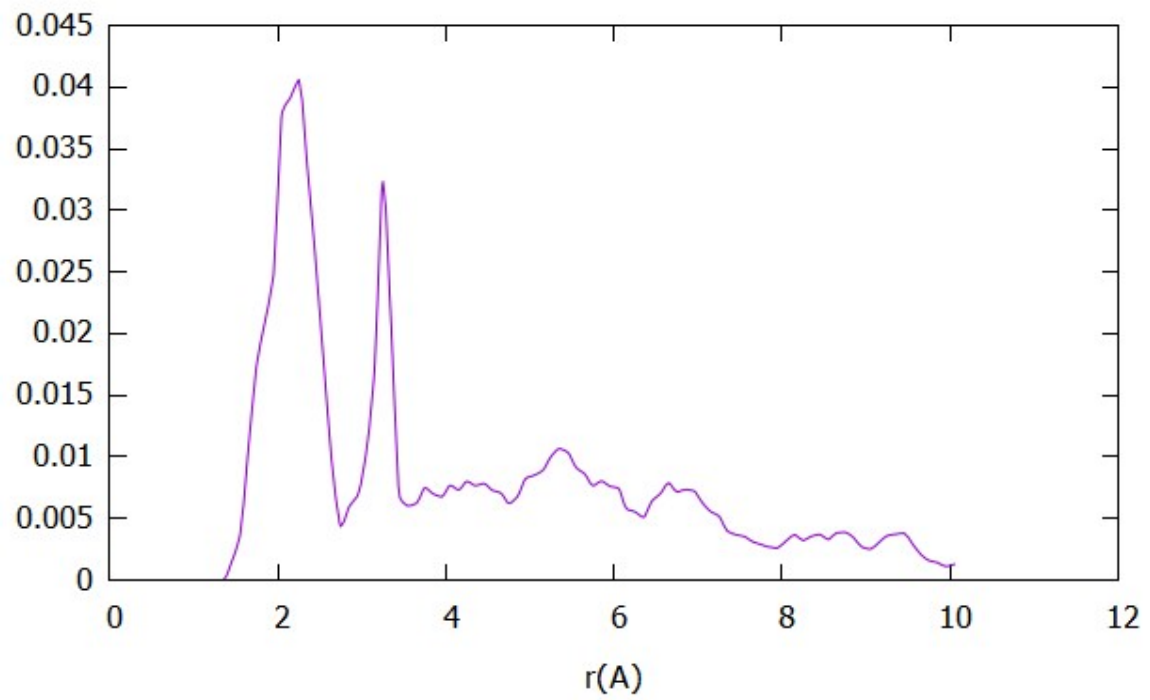

Supplement: d0sc05402j1.pdf [file d0sc05402j1.pdf]
